# Supplementary material for: Актуализация социологии Макса Вебера в экономических теориях: проблемы интерпретации и рецепции
Source: Royal Society of Chemistry journal article supplement (doi:10.1039/d3dt01724a), 2011-01-01
Supplement: d3dt01724a1.pdf [file d3dt01724a1.pdf]

## **Supporting Information**

### **Novel nitrogen-rich Lanthanum nitrides induced by the ligand effect under pressure**

Bo Jin<sup>a</sup>, Yuanyuan Liu<sup>a</sup>, Zhen Yao<sup>\*a</sup>, Shuang Liu<sup>\*a</sup> and Peng Wang<sup>\*a</sup>

*<sup>a</sup>State Key Laboratory of Superhard Materials, College of Physics, Jilin University,  
Changchun 130012, P.R. of China*

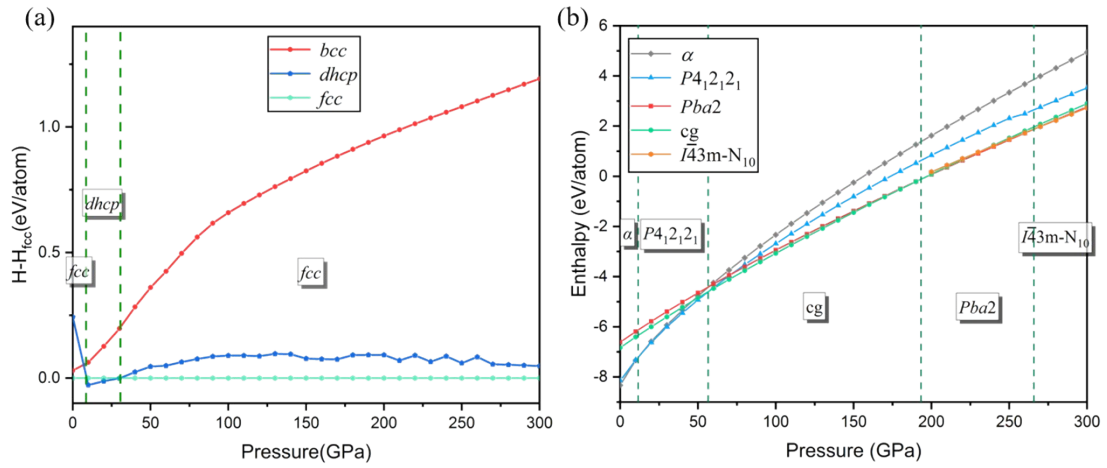

**Figure S1.** The enthalpy of (a) *fcc*, *bcc*, and *dhcp* phases of La, and (b)  $\alpha$ ,  $P4_12_12_1$ , *cg*-N, *Pba2*, and  $I4_3m-N_{10}$  phases of N.

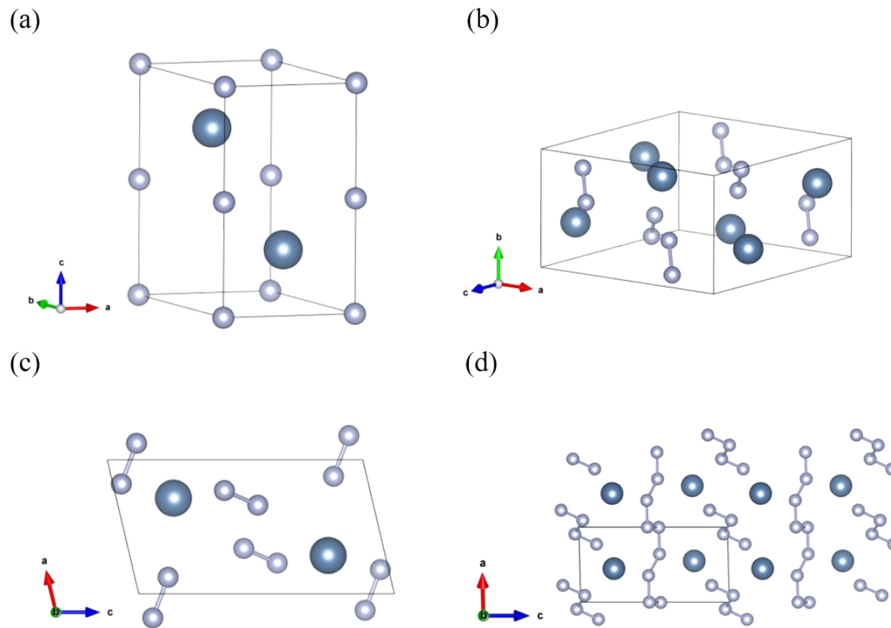

**Figure S2.** Crystal structures of predicted La-N compounds: (a)  $P63mc$  -  $LaN$  phase at 20GPa. (b)  $C2/c$  -  $LaN_2$  phase at 100GPa. (c)  $P\bar{1}(I)$  -  $LaN_4$  phase at 20GPa. (d)  $P\bar{1}(II)$  -  $LaN_4$  phase at 50GPa. The large spheres are lanthanum atoms, and the small ones are nitrogen atoms.

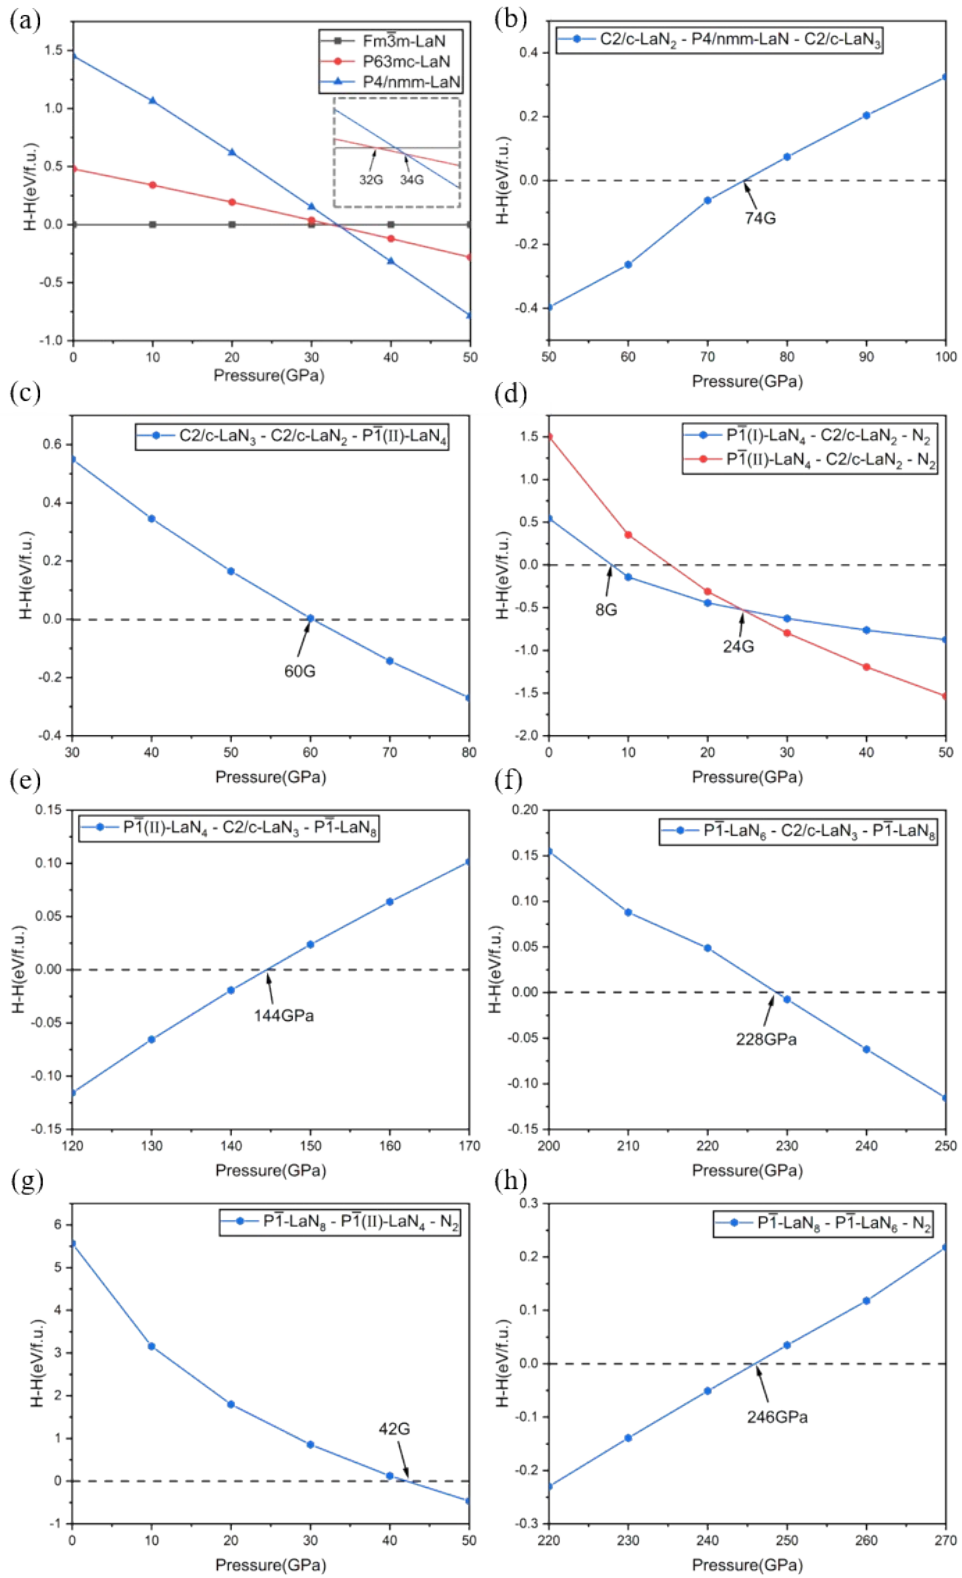

**Figure S3.** The enthalpy differences of (a)  $P63mc$  phase and  $P4/nm^m$  phase relative to  $Fm\bar{3}m$  LaN. (b)  $C2/c$ -LaN<sub>2</sub> relative to  $P4/nmm$ -LaN and  $C2/c$ -LaN<sub>3</sub>, (c)  $C2/c$ -LaN<sub>3</sub>

relative to  $C2/c$ -LaN<sub>2</sub> and  $P\bar{1}$ (II)-LaN<sub>4</sub>, (d)  $P\bar{1}$ (I) phase and  $P\bar{1}$ (II) phase LaN<sub>4</sub> relative to  $C2/c$ -LaN<sub>2</sub> and nitrogen, (e)  $P\bar{1}$ (II)-LaN<sub>4</sub> relative to  $C2/c$ -LaN<sub>3</sub> and  $P\bar{1}$ -LaN<sub>8</sub>, (f)  $P\bar{1}$ -LaN<sub>6</sub> relative to  $C2/c$ -LaN<sub>3</sub> and  $P\bar{1}$ -LaN<sub>8</sub>, (g)  $P\bar{1}$ -LaN<sub>8</sub> relative to  $P\bar{1}$ (II)-LaN<sub>4</sub> and nitrogen, (h)  $P\bar{1}$ -LaN<sub>8</sub> relative to  $P\bar{1}$ -LaN<sub>6</sub> and nitrogen.

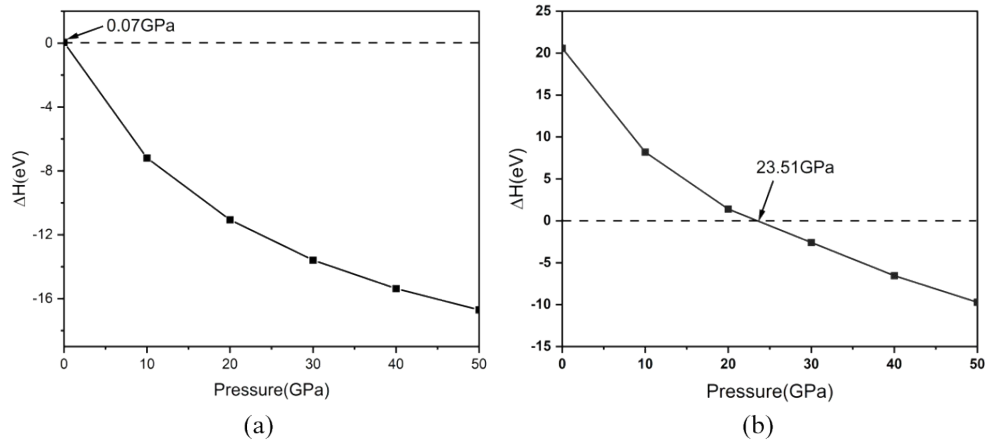

**Figure S4.** The enthalpy differences of (a)  $Pm\bar{3}m$ -LaN<sub>6</sub> and (b)  $Imm2$ -LaN<sub>10</sub> relative to pure La and pure N.

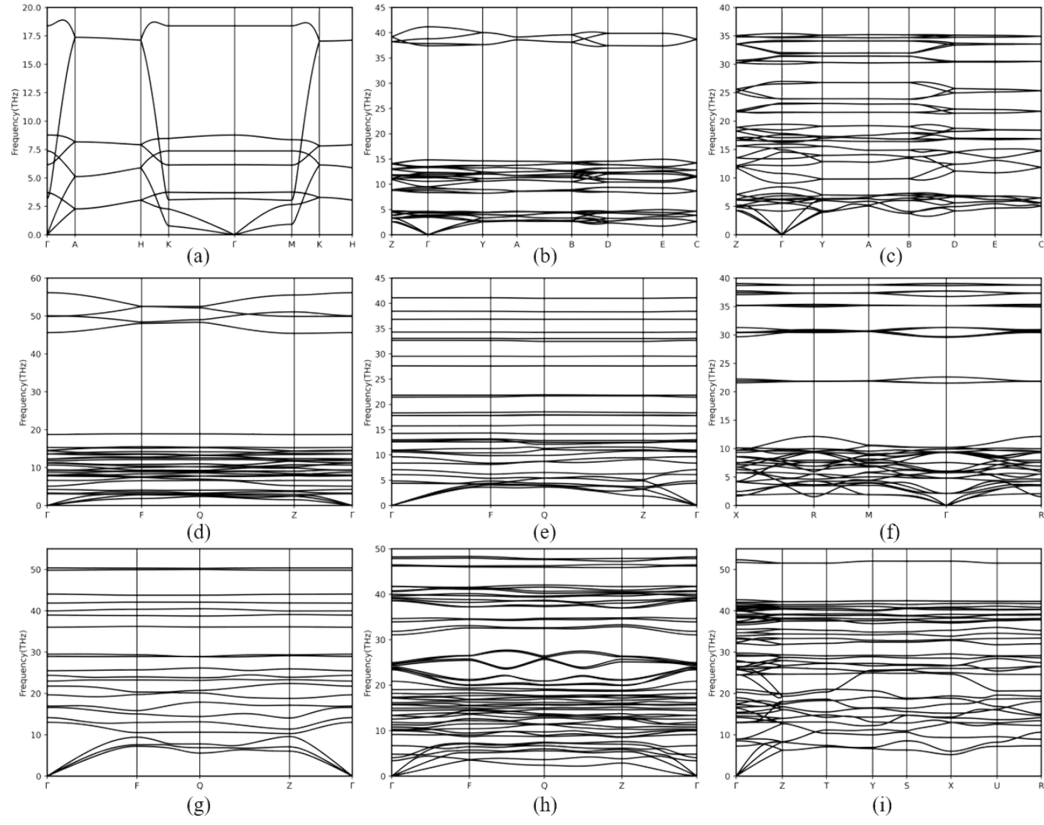

**Figure S5.** Phonon dispersion curves of nine predicted phases: (a)  $P63mc$  -  $\text{LaN}$  phase at 20GPa. (b)  $C2/c$ - $\text{LaN}_2$  phase at 0GPa. (c)  $C2/c$ - $\text{LaN}_3$  phase at 100GPa. (d)  $P\bar{1}(I)$ - $\text{LaN}_4$  phase at 20GPa. (e)  $P\bar{1}(II)$ - $\text{LaN}_4$  phase at 50GPa. (f)  $Pm\bar{3}m$  -  $\text{LaN}_6$  phase at 20GPa. (g)  $P\bar{1}$ - $\text{LaN}_6$  phase at 300GPa. (h)  $P\bar{1}$  -  $\text{LaN}_8$  phase at 100GPa. (i)  $Imm2$ - $\text{LaN}_{10}$  phase at 300GPa.

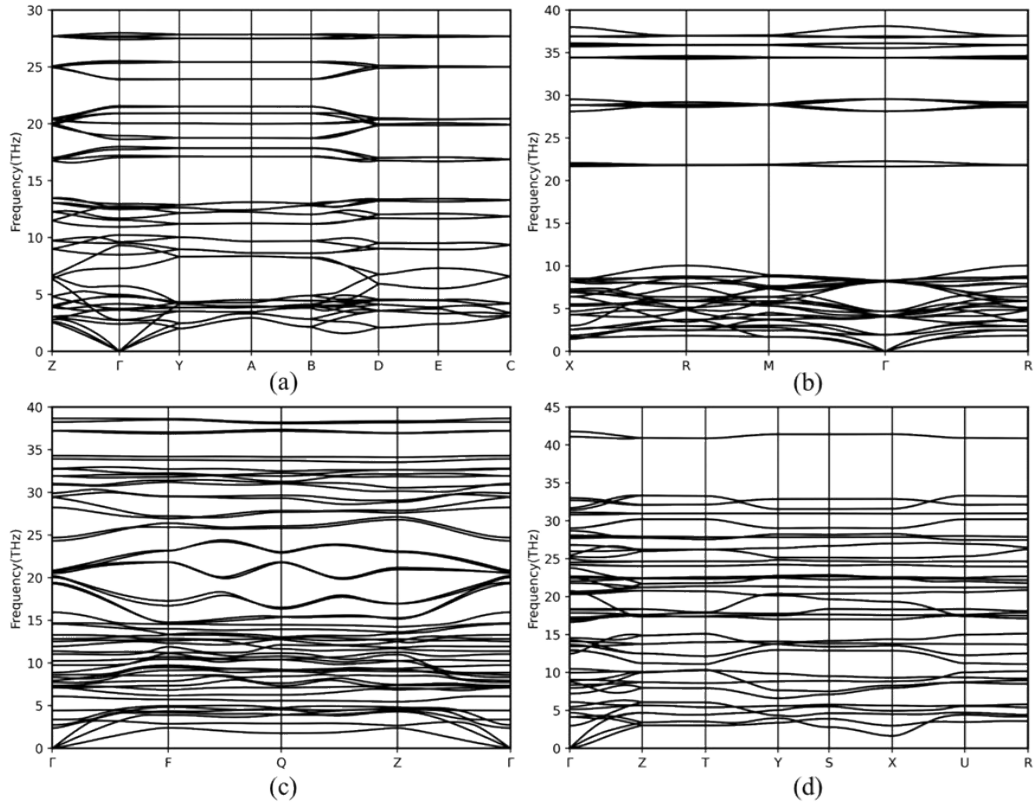

**Figure S6.** Phonon dispersion curves for (a)  $C2/c$ - $\text{LaN}_3$  phase at 0GPa. (b)  $Pm\bar{3}m$ - $\text{LaN}_6$  phase at 0GPa. (c)  $P\bar{1}$ - $\text{LaN}_8$  phase at 0GPa. (d)  $Imm2$ - $\text{LaN}_{10}$  phase at 25GPa.

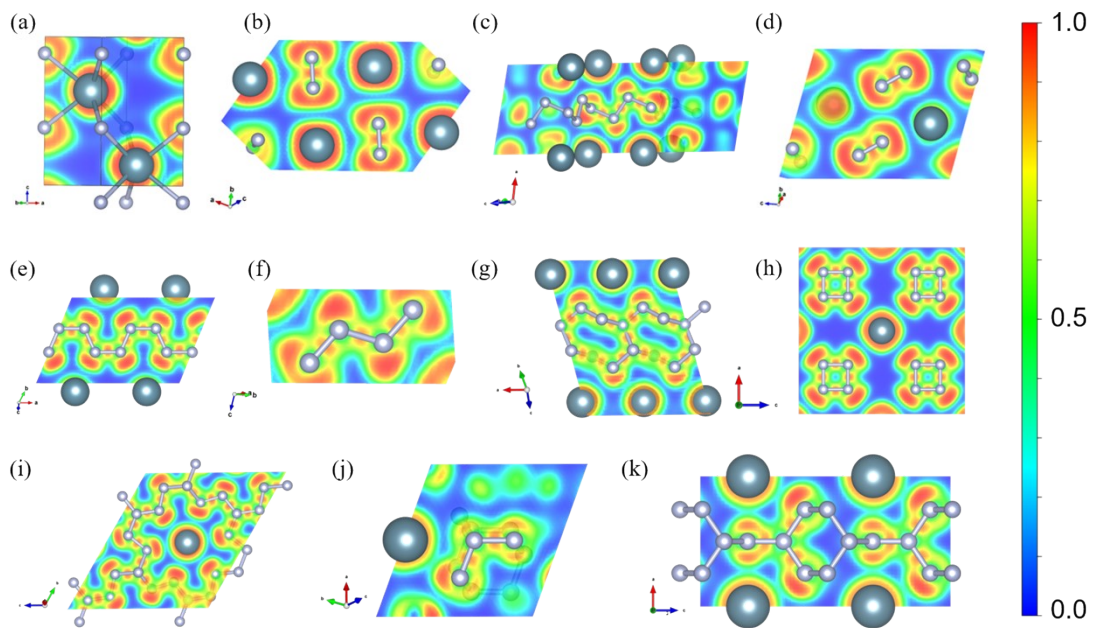

**Figure S7.** ELF of (a)  $P63mc$ -LaN phase at 20GPa. (b)  $C2/c$ - $\text{LaN}_2$  phase at 0GPa. (c)  $C2/c$ - $\text{LaN}_3$  at 100 GPa, (d)  $P\bar{1}(I)$ - $\text{LaN}_4$  phase at 20GPa. (e) and (f)  $P\bar{1}(II)$ - $\text{LaN}_4$  phase at 50GPa, (g)  $P\bar{1}$ - $\text{LaN}_6$  at 300 GPa, (h)  $Pm\bar{3}m$ - $\text{LaN}_6$  at 20 GPa, (i)  $P\bar{1}$ - $\text{LaN}_8$  at 100 GPa, (j) and (k)  $Imm2$ - $\text{LaN}_{10}$  at 300 GPa.

**Table S1.** Structural parameters of predicted La-N compounds.

| Phases                          | Pressure | Lattice Parameters<br>(Å) | Wyckoff Positions |        |        |        |
|---------------------------------|----------|---------------------------|-------------------|--------|--------|--------|
|                                 |          |                           | Atoms             | x      | y      | z      |
| $P63mc$ -LaN                    | 20GPa    | a = 3.5294                | La1(2d)           | 0.3333 | 0.6667 | 0.7500 |
|                                 |          | b = 3.5294                | N1(2a)            | 0.0000 | 0.0000 | 0.5000 |
|                                 |          | c = 6.2466                |                   |        |        |        |
|                                 |          | $\alpha = 90$             |                   |        |        |        |
|                                 |          | $\beta = 90$              |                   |        |        |        |
|                                 |          | $\gamma = 120$            |                   |        |        |        |
| $C2/c$ - $\text{LaN}_2$         | 1atm     | a = 6.8040                | La1(4e)           | 0.5000 | 0.1993 | 0.2500 |
|                                 |          | b = 4.1854                | N1(8f)            | 0.6989 | 0.3675 | 0.9473 |
|                                 |          | c = 6.7624                |                   |        |        |        |
|                                 |          | $\alpha = 90$             |                   |        |        |        |
|                                 |          | $\beta = 104.1053$        |                   |        |        |        |
|                                 |          | $\gamma = 90$             |                   |        |        |        |
| $C2/c$ - $\text{LaN}_3$         | 100GPa   | a = 4.9259                | La1(4e)           | 0.0000 | 0.3460 | 0.2500 |
|                                 |          | b = 5.5858                | N1(4e)            | 0.5000 | 0.2963 | 0.2500 |
|                                 |          | c = 5.0342                | N2(8f)            | 0.3843 | 0.4524 | 0.0453 |
|                                 |          | $\alpha = 90$             |                   |        |        |        |
|                                 |          | $\beta = 99.2436$         |                   |        |        |        |
|                                 |          | $\gamma = 90$             |                   |        |        |        |
| $P\bar{1}(I)$ - $\text{LaN}_4$  | 20GPa    | a = 3.9262                | La1(2i)           | 0.7140 | 0.2977 | 0.2238 |
|                                 |          | b = 4.3309                | N1(2i)            | 0.1231 | 0.7214 | 0.1297 |
|                                 |          | c = 7.1668                | N2(2i)            | 0.6613 | 0.7155 | 0.5475 |
|                                 |          | $\alpha = 94.8466$        | N3(2i)            | 0.1805 | 0.2293 | 0.9675 |
|                                 |          | $\beta = 103.9189$        | N4(2i)            | 0.2295 | 0.1809 | 0.5701 |
|                                 |          | $\gamma = 78.3645$        |                   |        |        |        |
| $P\bar{1}(II)$ - $\text{LaN}_4$ | 50GPa    | a = 3.7431                | La1(2i)           | 0.4489 | 0.9837 | 0.2293 |
|                                 |          | b = 4.0440                | N1(2i)            | 0.0921 | 0.6186 | 0.0280 |
|                                 |          | c = 6.9085                | N2(2i)            | 0.6432 | 0.3624 | 0.5387 |
|                                 |          | $\alpha = 102.4135$       | N3(2i)            | 0.2263 | 0.6923 | 0.8836 |
|                                 |          | $\beta = 96.3620$         | N4(2i)            | 0.0019 | 0.6371 | 0.4615 |

|                                   |        |                                                                                                          |                                                                                         |                                                                                        |                                                                                        |                                                                                        |
|-----------------------------------|--------|----------------------------------------------------------------------------------------------------------|-----------------------------------------------------------------------------------------|----------------------------------------------------------------------------------------|----------------------------------------------------------------------------------------|----------------------------------------------------------------------------------------|
|                                   |        | $\gamma = 65.7927$                                                                                       |                                                                                         |                                                                                        |                                                                                        |                                                                                        |
| $P\bar{1} - \text{LaN}_6$         | 300GPa | a = 2.9699<br>b = 3.2655<br>c = 4.4789<br>$\alpha = 111.1590$<br>$\beta = 96.1780$<br>$\gamma = 72.9577$ | La1(1g)<br>N1(2i)<br>N2(2i)<br>N3(2i)                                                   | 0.0000<br>0.6277<br>0.6284<br>0.9828                                                   | 0.5000<br>0.9759<br>0.2886<br>0.8229                                                   | 0.5000<br>0.2349<br>0.8078<br>0.0393                                                   |
| $Pm$<br>$\bar{3}m - \text{LaN}_6$ | 20GPa  | a = 5.1815<br>b = 5.1815<br>c = 5.1815<br>$\alpha = 90$<br>$\beta = 90$<br>$\gamma = 90$                 | La1(1a)<br>La2(1b)<br>N1(12j)                                                           | 0.0000<br>0.5000<br>0.5000                                                             | 0.0000<br>0.5000<br>0.1322                                                             | 0.0000<br>0.5000<br>0.1322                                                             |
| $P\bar{1} - \text{LaN}_8$         | 100GPa | a = 4.7182<br>b = 5.6176<br>c = 5.6641<br>$\alpha = 119.6460$<br>$\beta = 89.3950$<br>$\gamma = 76.2834$ | La1(2i)<br>N1(2i)<br>N2(2i)<br>N3(2i)<br>N4(2i)<br>N5(2i)<br>N6(2i)<br>N7(2i)<br>N8(2i) | 0.2211<br>0.2583<br>0.3330<br>0.2407<br>0.2449<br>0.2536<br>0.2223<br>0.2534<br>0.2691 | 0.0968<br>0.4208<br>0.7285<br>0.6304<br>0.1740<br>0.4601<br>0.5569<br>0.9995<br>0.7193 | 0.7848<br>0.4484<br>0.0938<br>0.6923<br>0.4114<br>0.2425<br>0.8756<br>0.1416<br>0.3216 |
| $Imm2 - \text{LaN}_{10}$          | 300GPa | a = 4.3632<br>b = 5.6826<br>c = 4.2244<br>$\alpha = 90$<br>$\beta = 90$<br>$\gamma = 90$                 | La1(2b)<br>N1(2a)<br>N2(2a)<br>N3(4c)<br>N4(4d)<br>N5(8e)                               | 0.0000<br>0.0000<br>0.0000<br>0.7463<br>0.0000<br>0.2474                               | 0.5000<br>0.0000<br>0.0000<br>0.5000<br>0.8193<br>0.1851                               | 0.3812<br>0.8765<br>0.1676<br>0.8374<br>0.6888<br>0.5160                               |

**Table S2.** Bader calculation of predicted La-N compounds.

| Structure<br>(Pressure) | $P63mc - \text{LaN}$<br>(20G) | $C2/c - \text{LaN}_2$<br>(0G) | $P\bar{1}(I) - \text{LaN}_4$<br>(20G) | $P\bar{1}(II) - \text{LaN}_4$<br>(50G) |
|-------------------------|-------------------------------|-------------------------------|---------------------------------------|----------------------------------------|
| Lost electrons of La    | 1.84                          | 1.93                          | 2.06                                  | 2.03                                   |

| $C2/c - \text{LaN}_3$<br>(100G) | $P\bar{1} - \text{LaN}_6$<br>(300G) | $Pm\bar{3}m - \text{LaN}_6$<br>(20G) | $P\bar{1} - \text{LaN}_8$<br>(50G) | $Imm2 - \text{LaN}_{10}$<br>(300G) |
|---------------------------------|-------------------------------------|--------------------------------------|------------------------------------|------------------------------------|
| 1.95                            | 1.89                                | 2.10                                 | 2.04                               | 1.89                               |
